# Supplementary material
Source: PubMed Central journal article supplement (PMC2495029)

## Supporting Information

### Rhodium(I)-Catalyzed Nucleophilic Ring Opening Reactions of Oxabicyclo Adducts Derived from the [4+2]-Cycloaddition of 2-Imido Substituted Furans

*Albert Padwa\* and Qiu Wang*

*Department of Chemistry, Emory University, Atlanta, Georgia 30322*

**Supporting Information Available:**  $^1\text{H}$  and  $^{13}\text{C}$  NMR data of various key compounds lacking CHN analyses together with an ORTEP drawing for compounds **41**, **51** and **53**. This material is available free of charge *via* the Internet at <http://pubs.acs.org>.

**General Experimental Section Paragraph:** Melting points are uncorrected. Mass spectra were determined at an ionizing voltage of 70eV. Unless otherwise noted, all reactions were performed in flame dried glassware under an atmosphere of dry nitrogen. Solutions were evaporated under reduced pressure with a rotary evaporator and the residue was chromatographed on a silica gel column using an ethyl acetate-hexane mixture as the eluent unless specified otherwise.

#### Table of Contents for Supporting Information:

|     |                                                      |
|-----|------------------------------------------------------|
| S3  | $^1\text{H}$ -NMR spectrum of compound <b>26</b>     |
| S4  | $^1\text{H}$ -NMR spectrum of compound <b>28</b>     |
| S5  | $^{13}\text{C}$ -NMR spectrum of compound <b>29</b>  |
| S6  | $^1\text{H}$ -NMR spectrum of compound <b>30</b>     |
| S7  | $^1\text{H}$ -NMR spectrum of compound <b>31</b>     |
| S8  | $^1\text{H}$ -NMR spectrum of compound <b>40a</b>    |
| S9  | $^{13}\text{C}$ -NMR spectrum of compound <b>40b</b> |
| S10 | $^1\text{H}$ -NMR spectrum of compound <b>41</b>     |

- S11  $^{13}\text{C}$ -NMR spectrum of compound **42**
- S12  $^{13}\text{C}$ -NMR spectrum of compound **43**
- S13  $^1\text{H}$ -NMR spectrum of compound **44a**
- S14  $^1\text{H}$ -NMR spectrum of compound **46**
- S15  $^{13}\text{C}$ -NMR spectrum of compound **53**
- S16  $^1\text{H}$ -NMR spectrum of compound **56**
- S17 Ortep Drawing of compound **41**
- S18 Ortep Drawing of compound **51**
- S19 Ortep Drawing of compound **53**

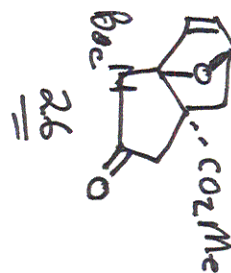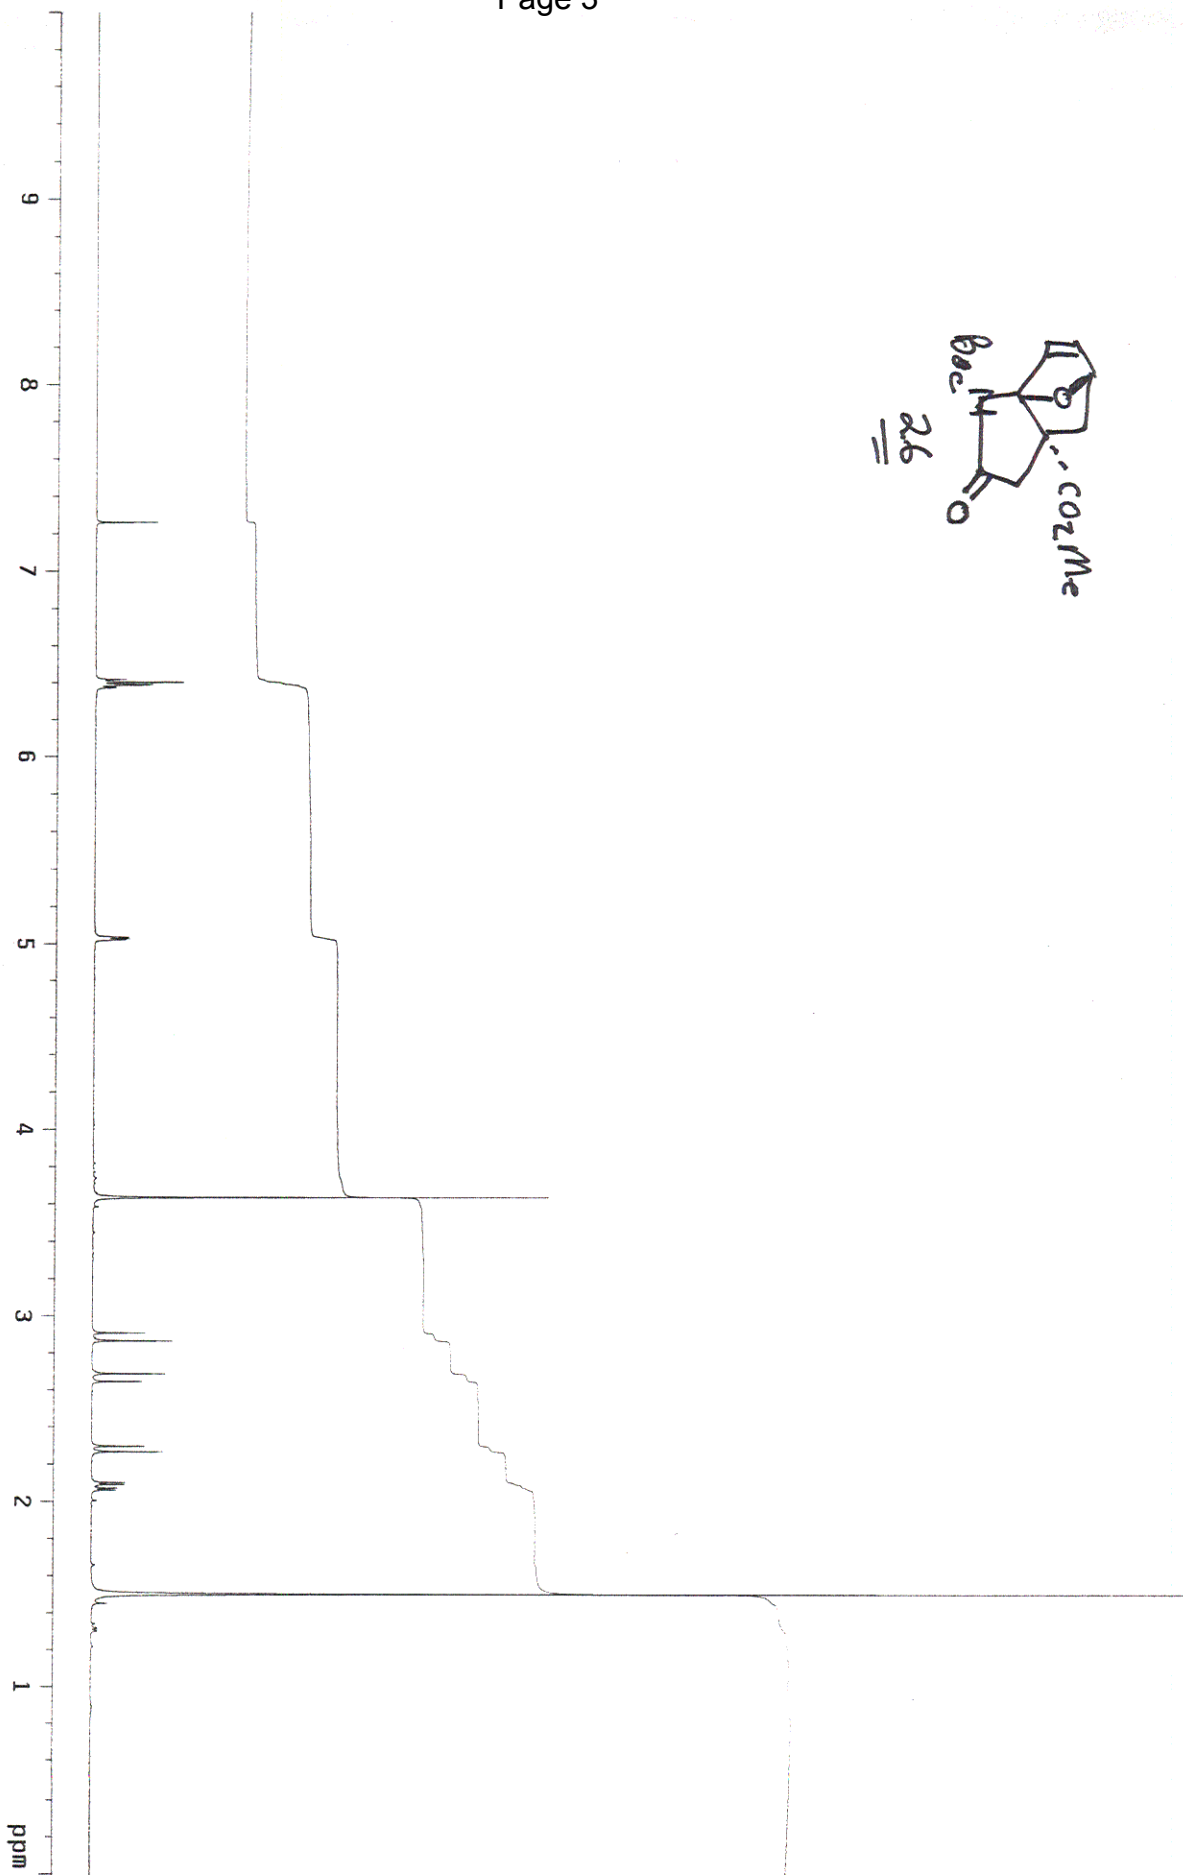

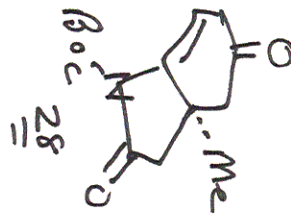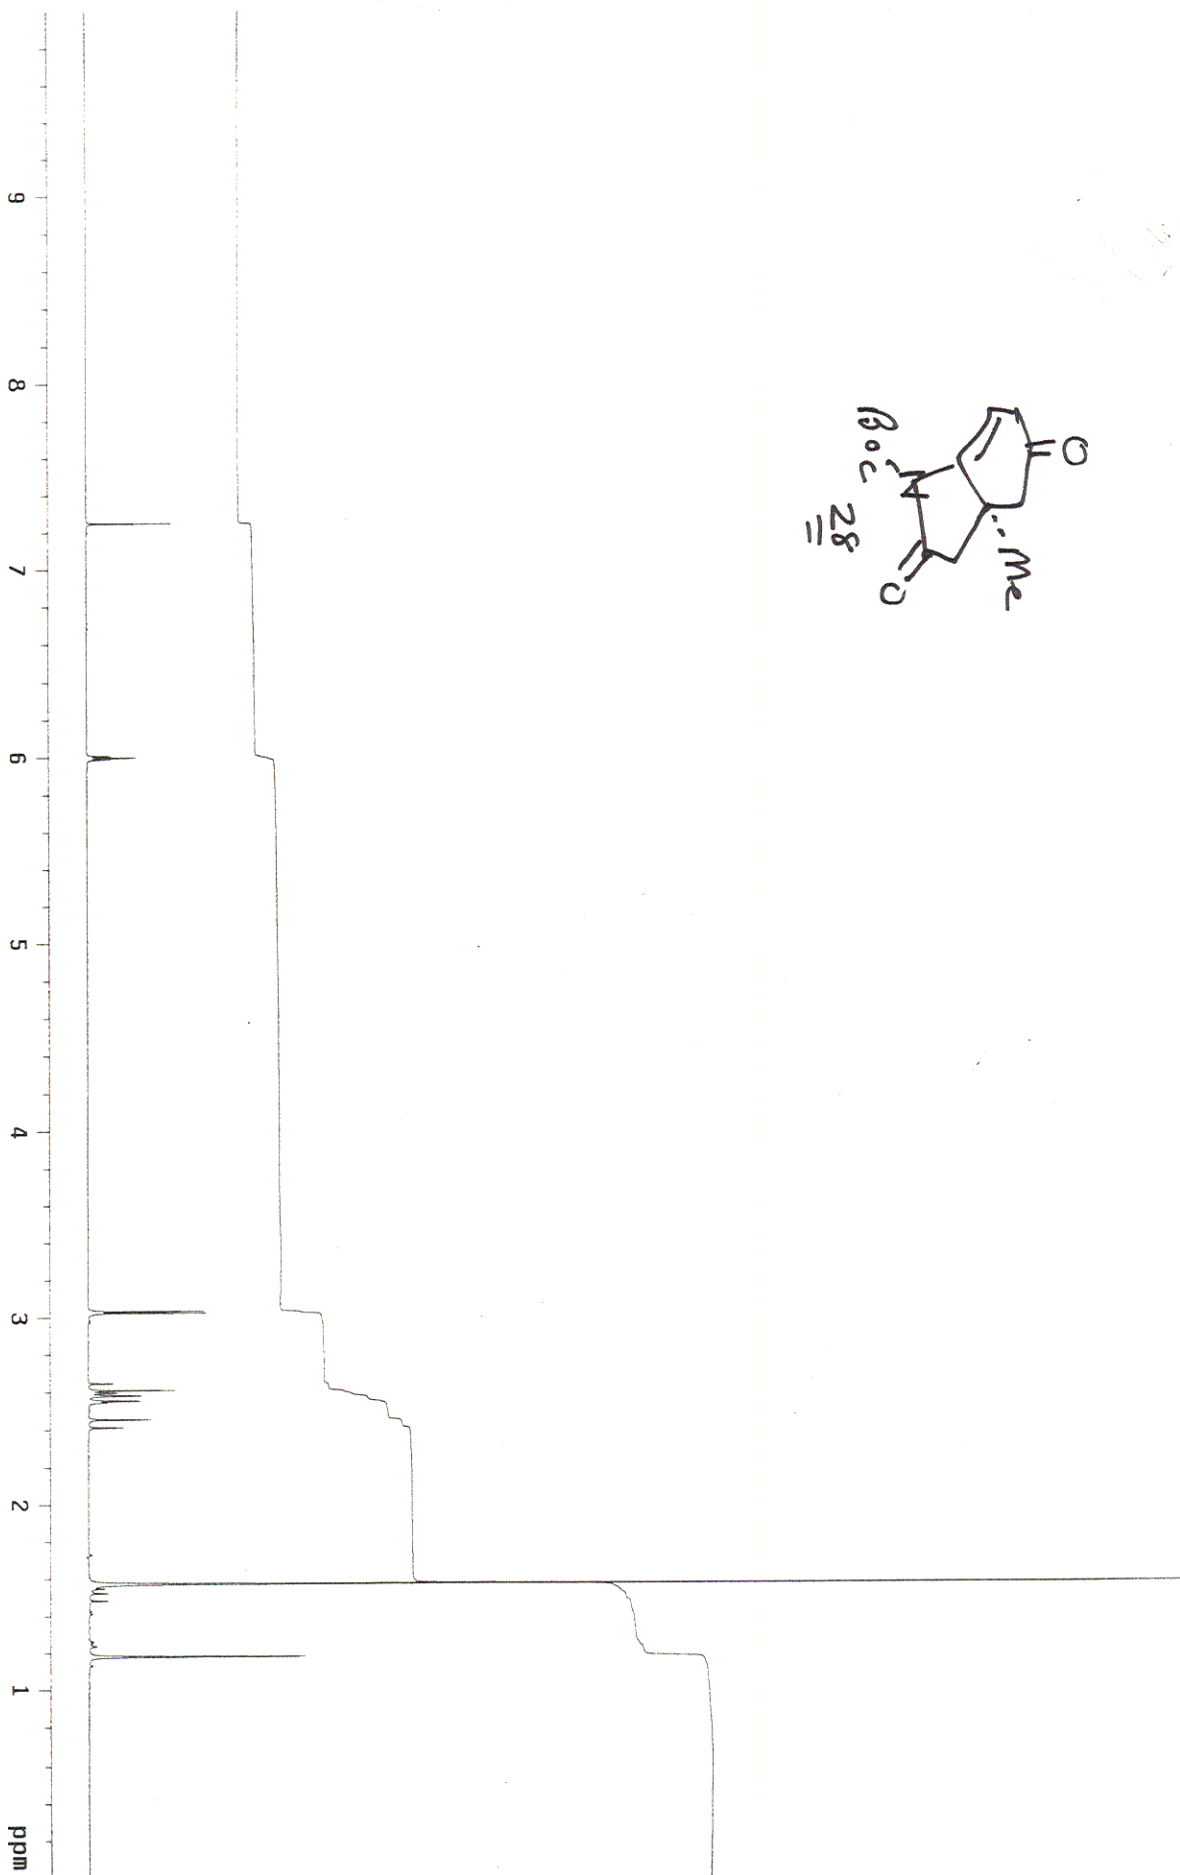

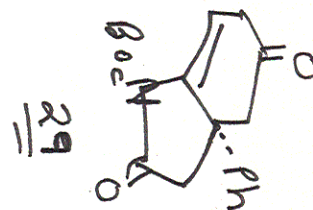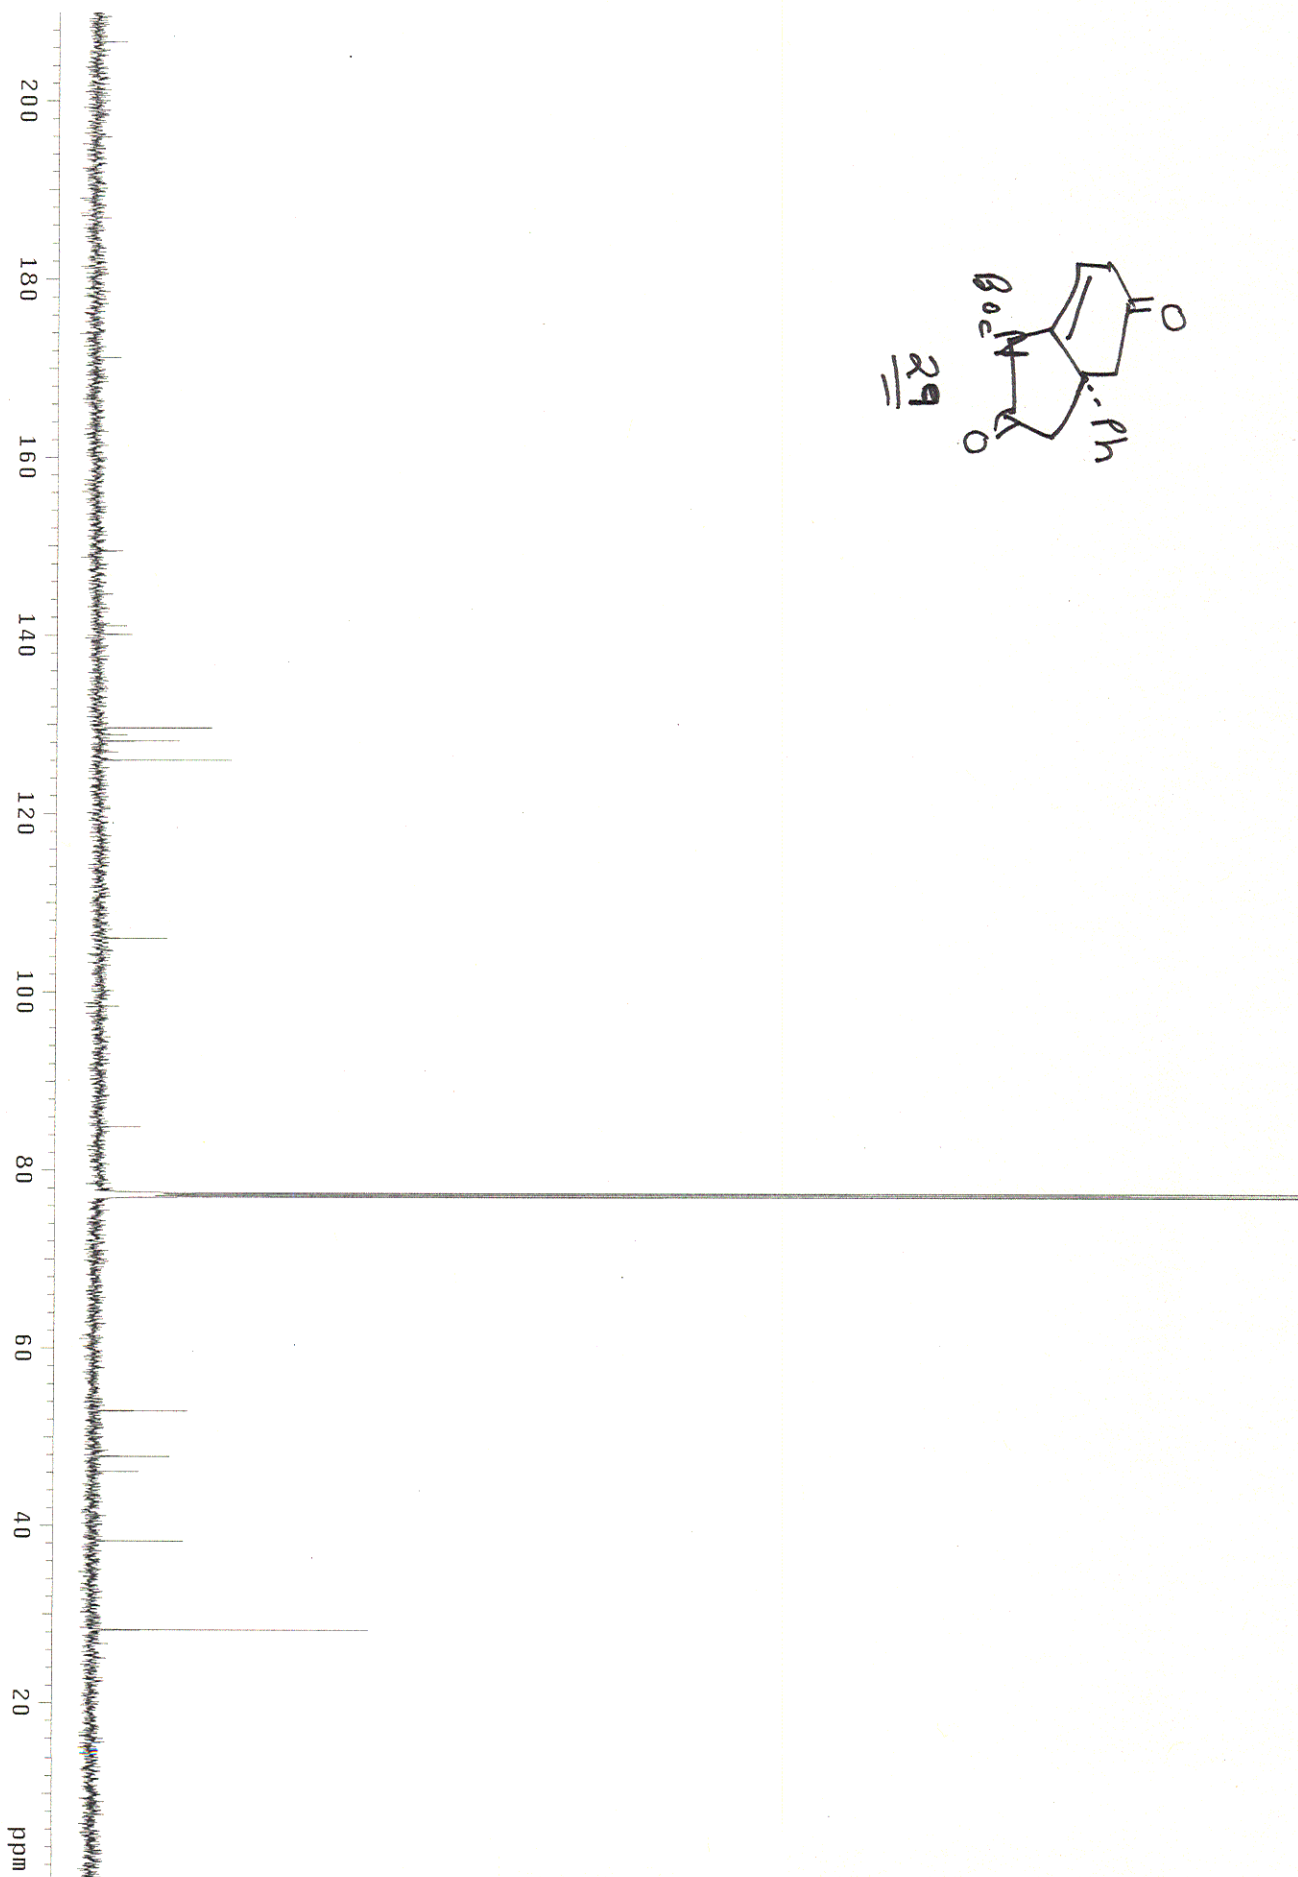

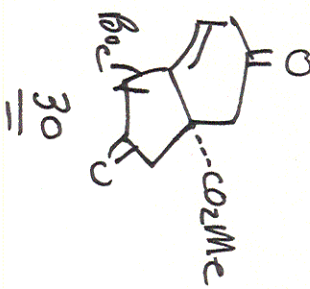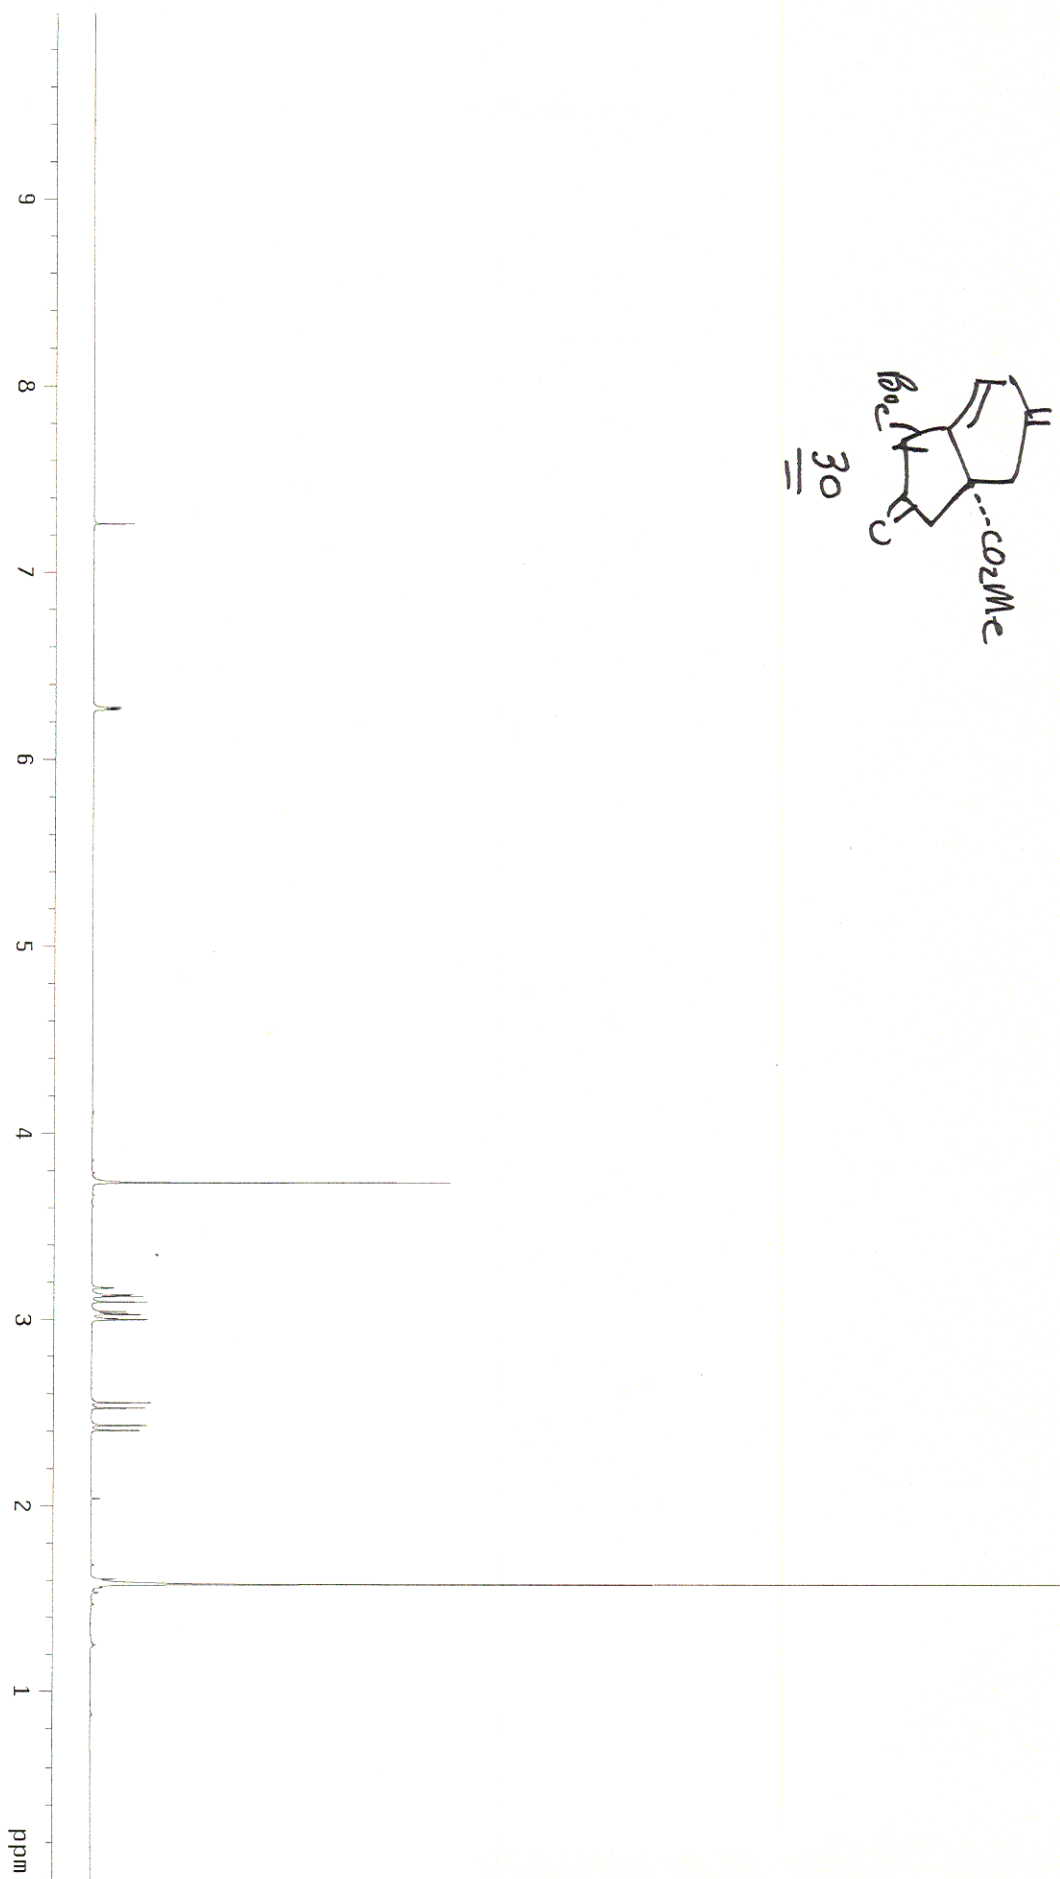

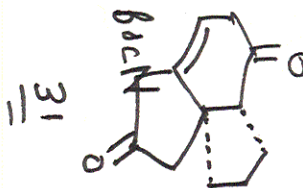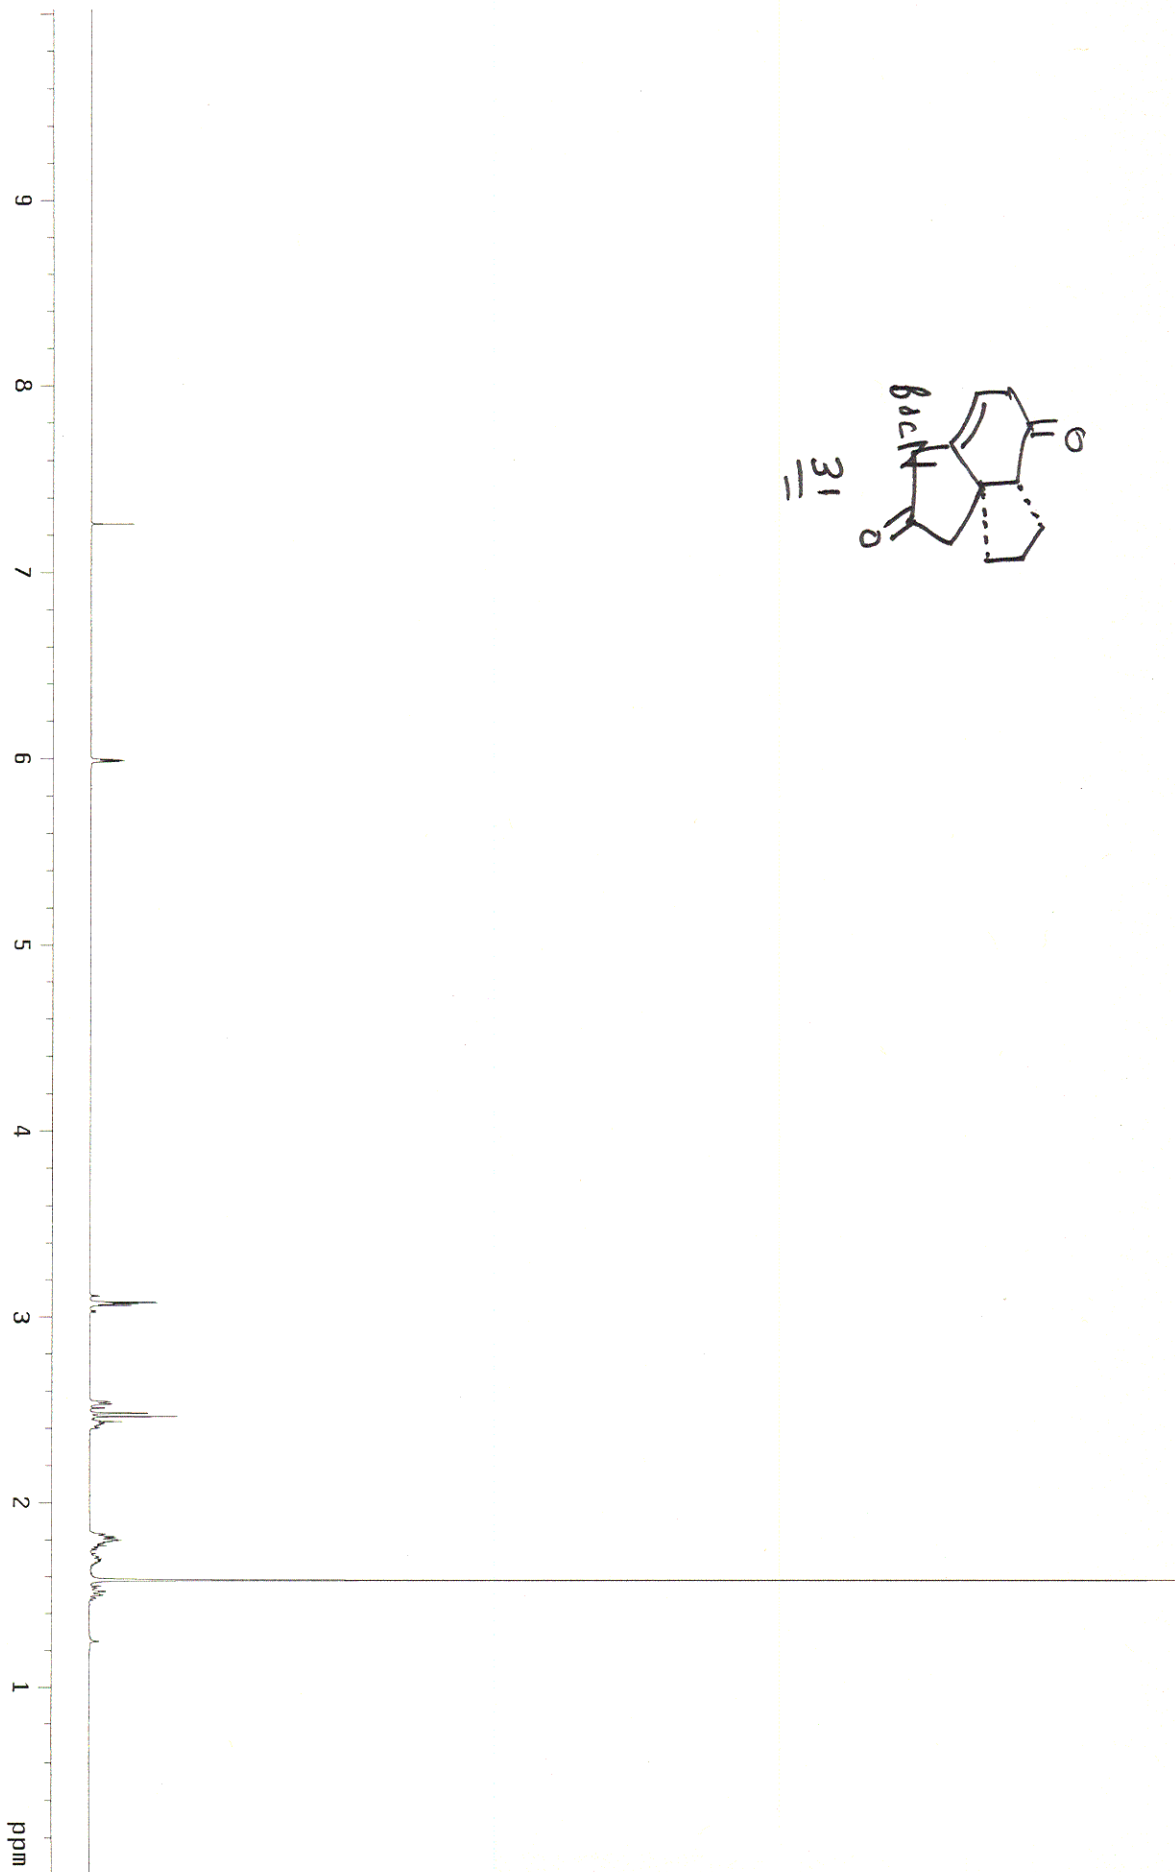

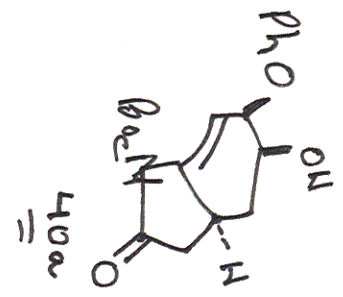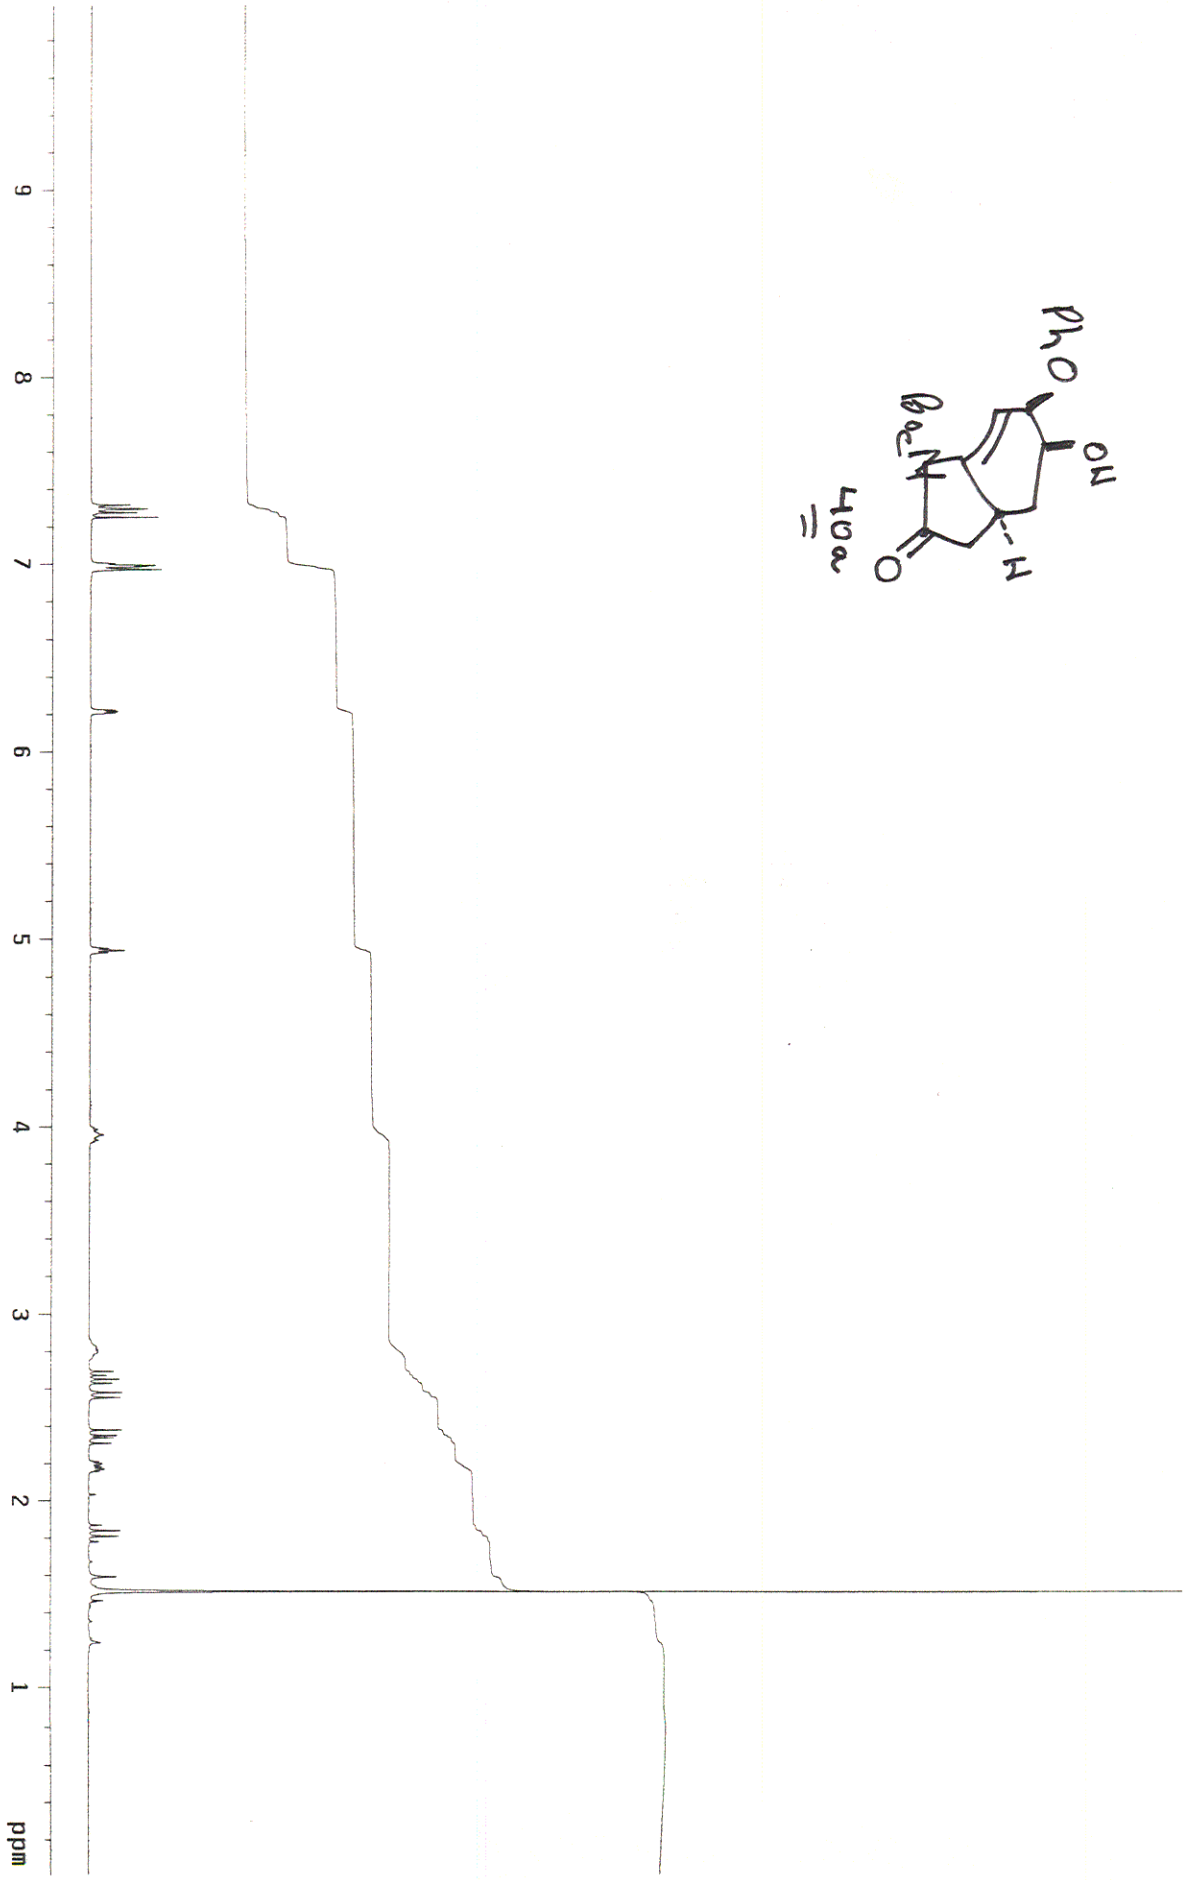



3wq-081-C-c13  
Pulse Sequence: szpu1

2wq-191-minor

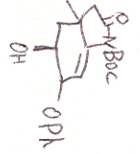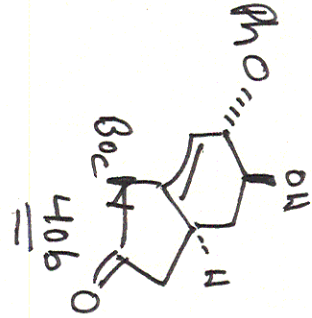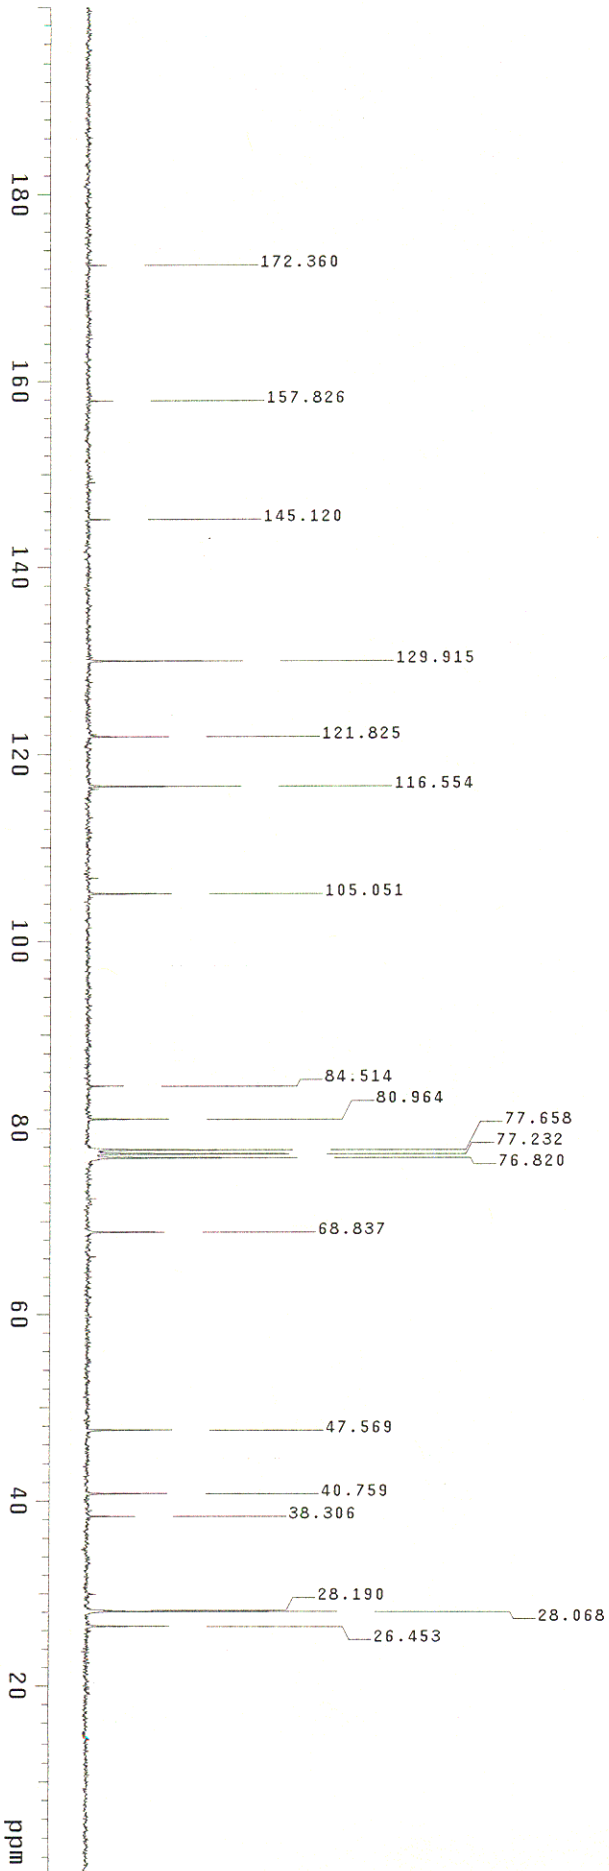

2wq-191-major  
Pulse Sequence: szpu1

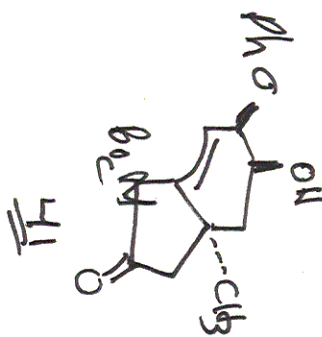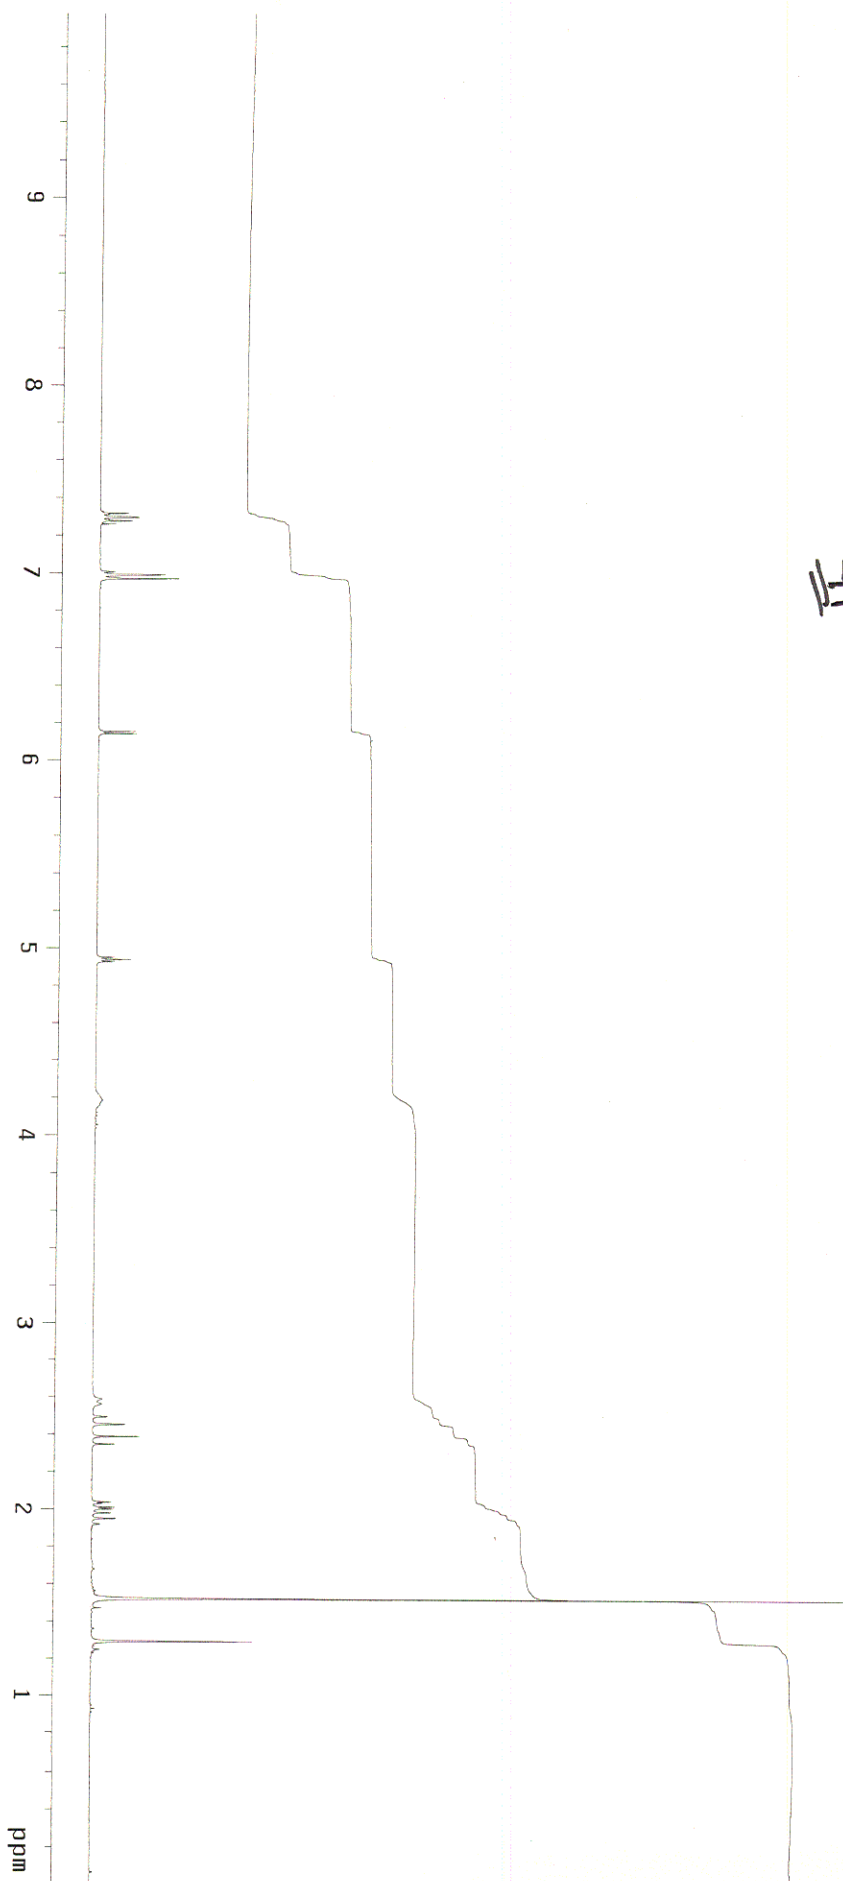

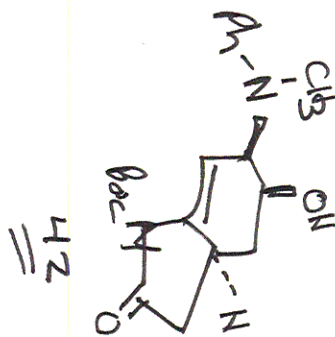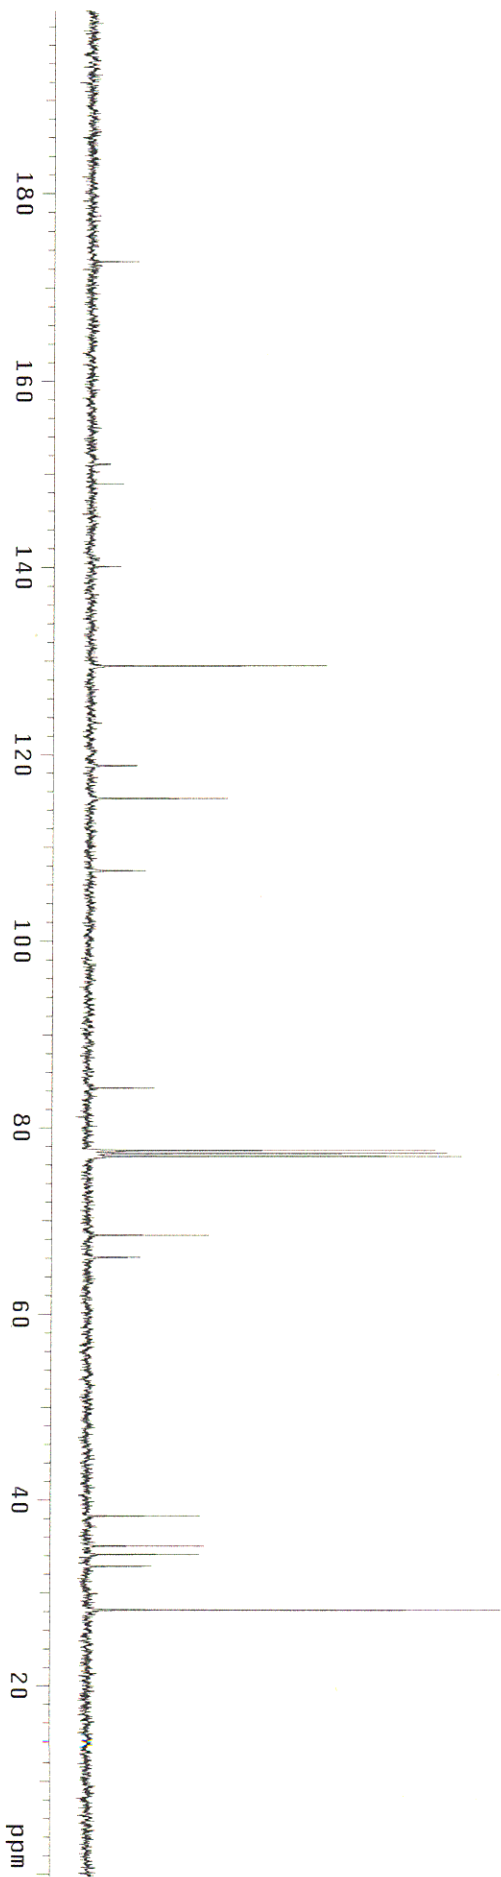

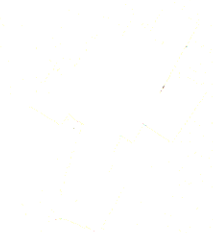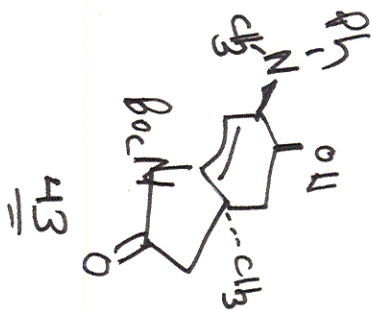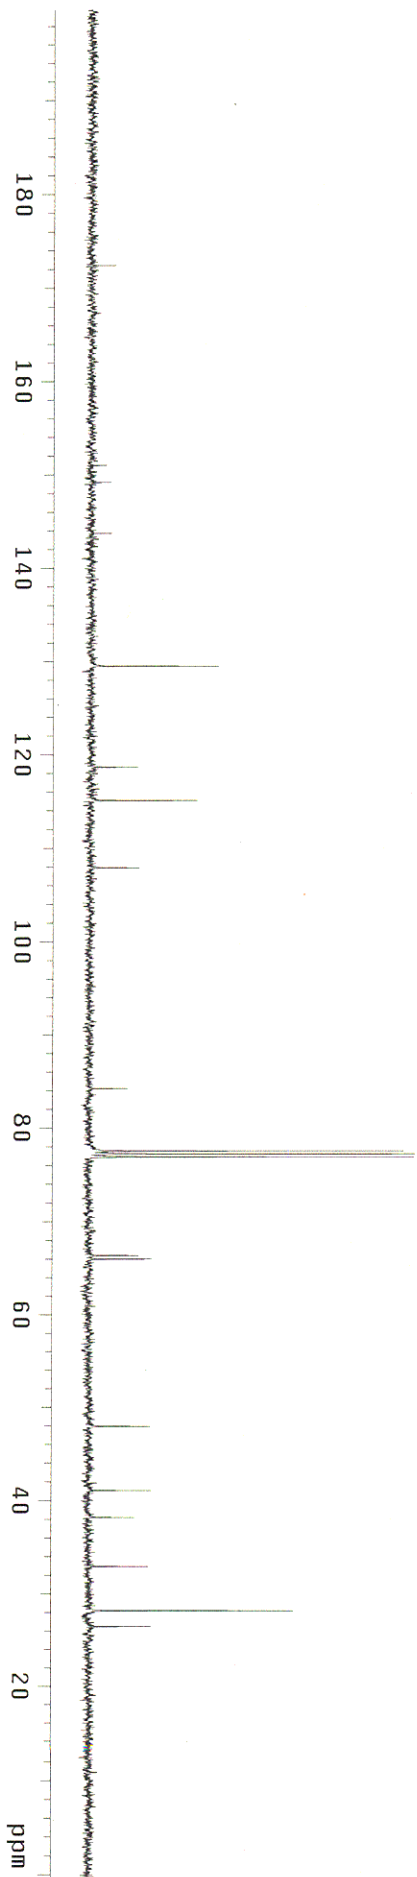

Swq-260-major  
Pulse Sequence: s2pu1

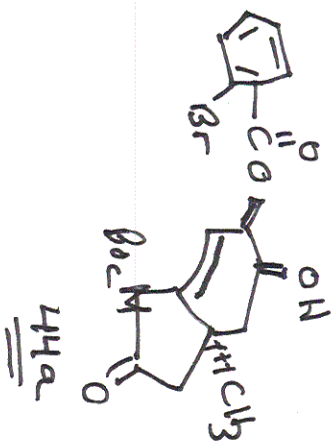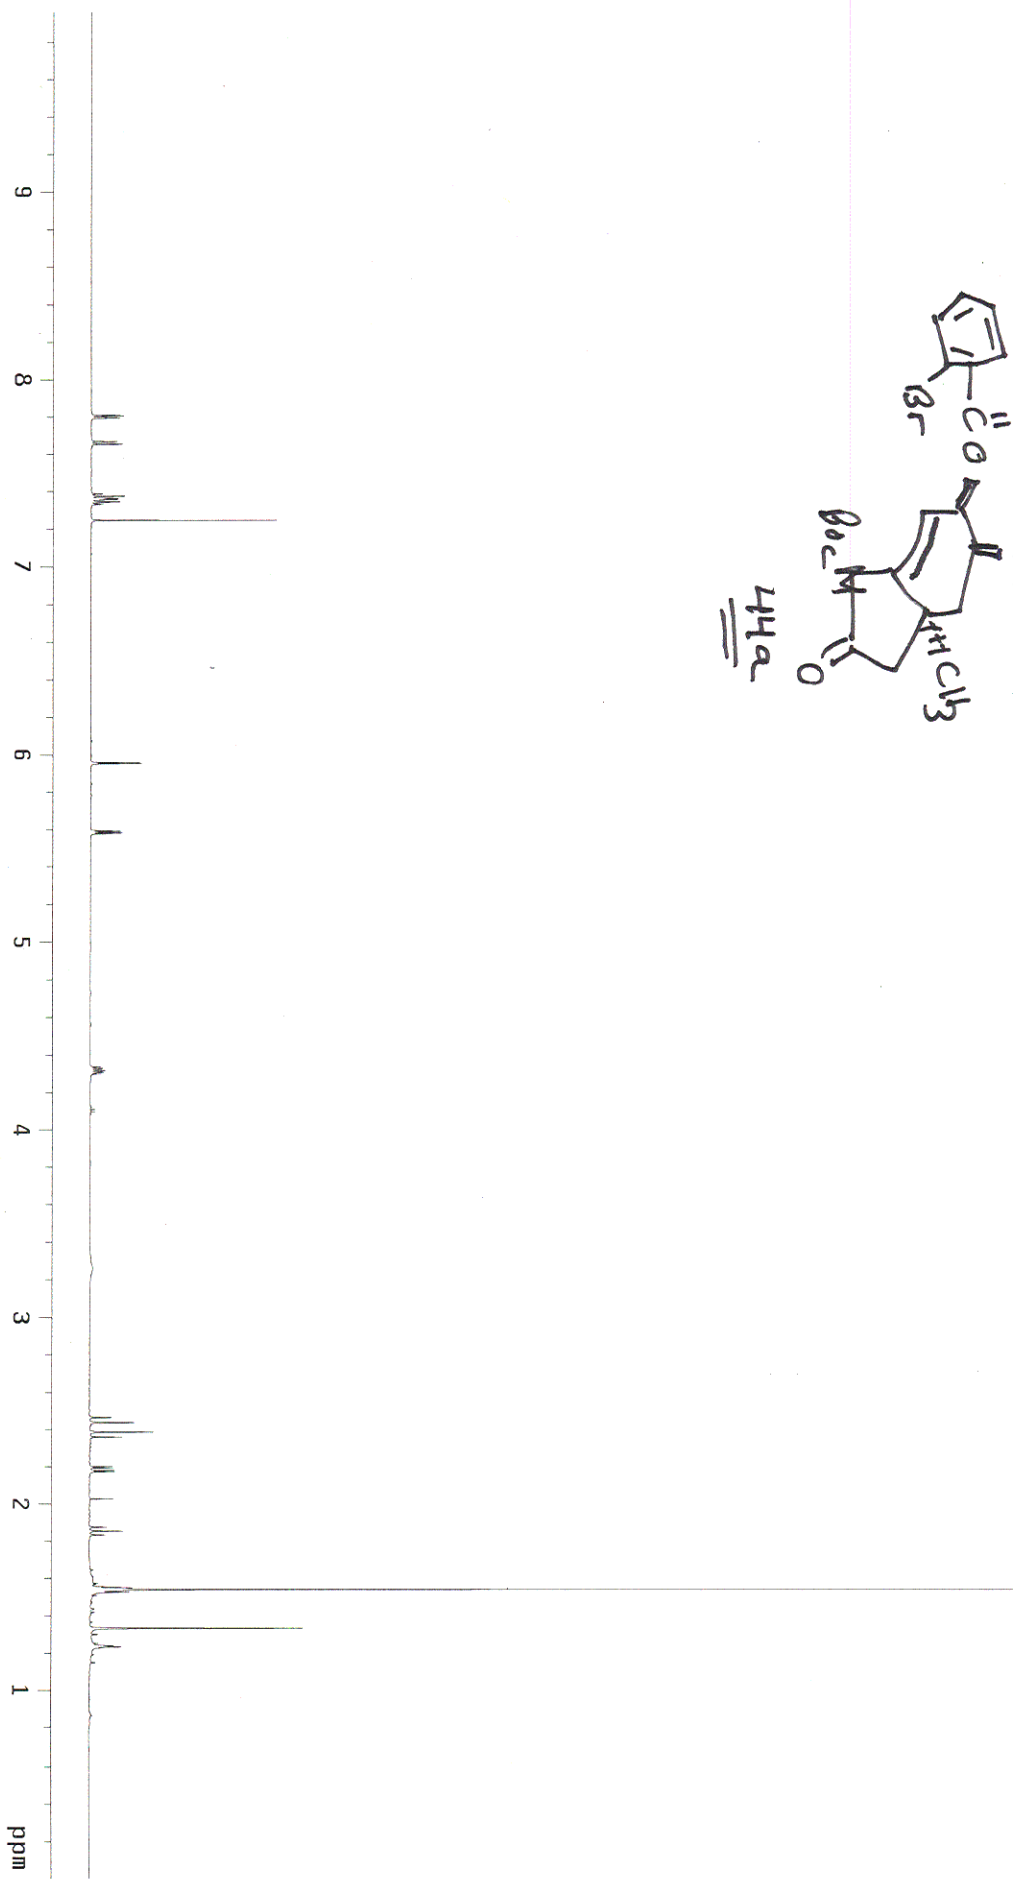

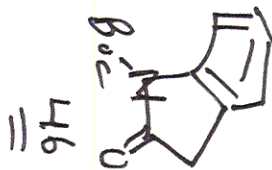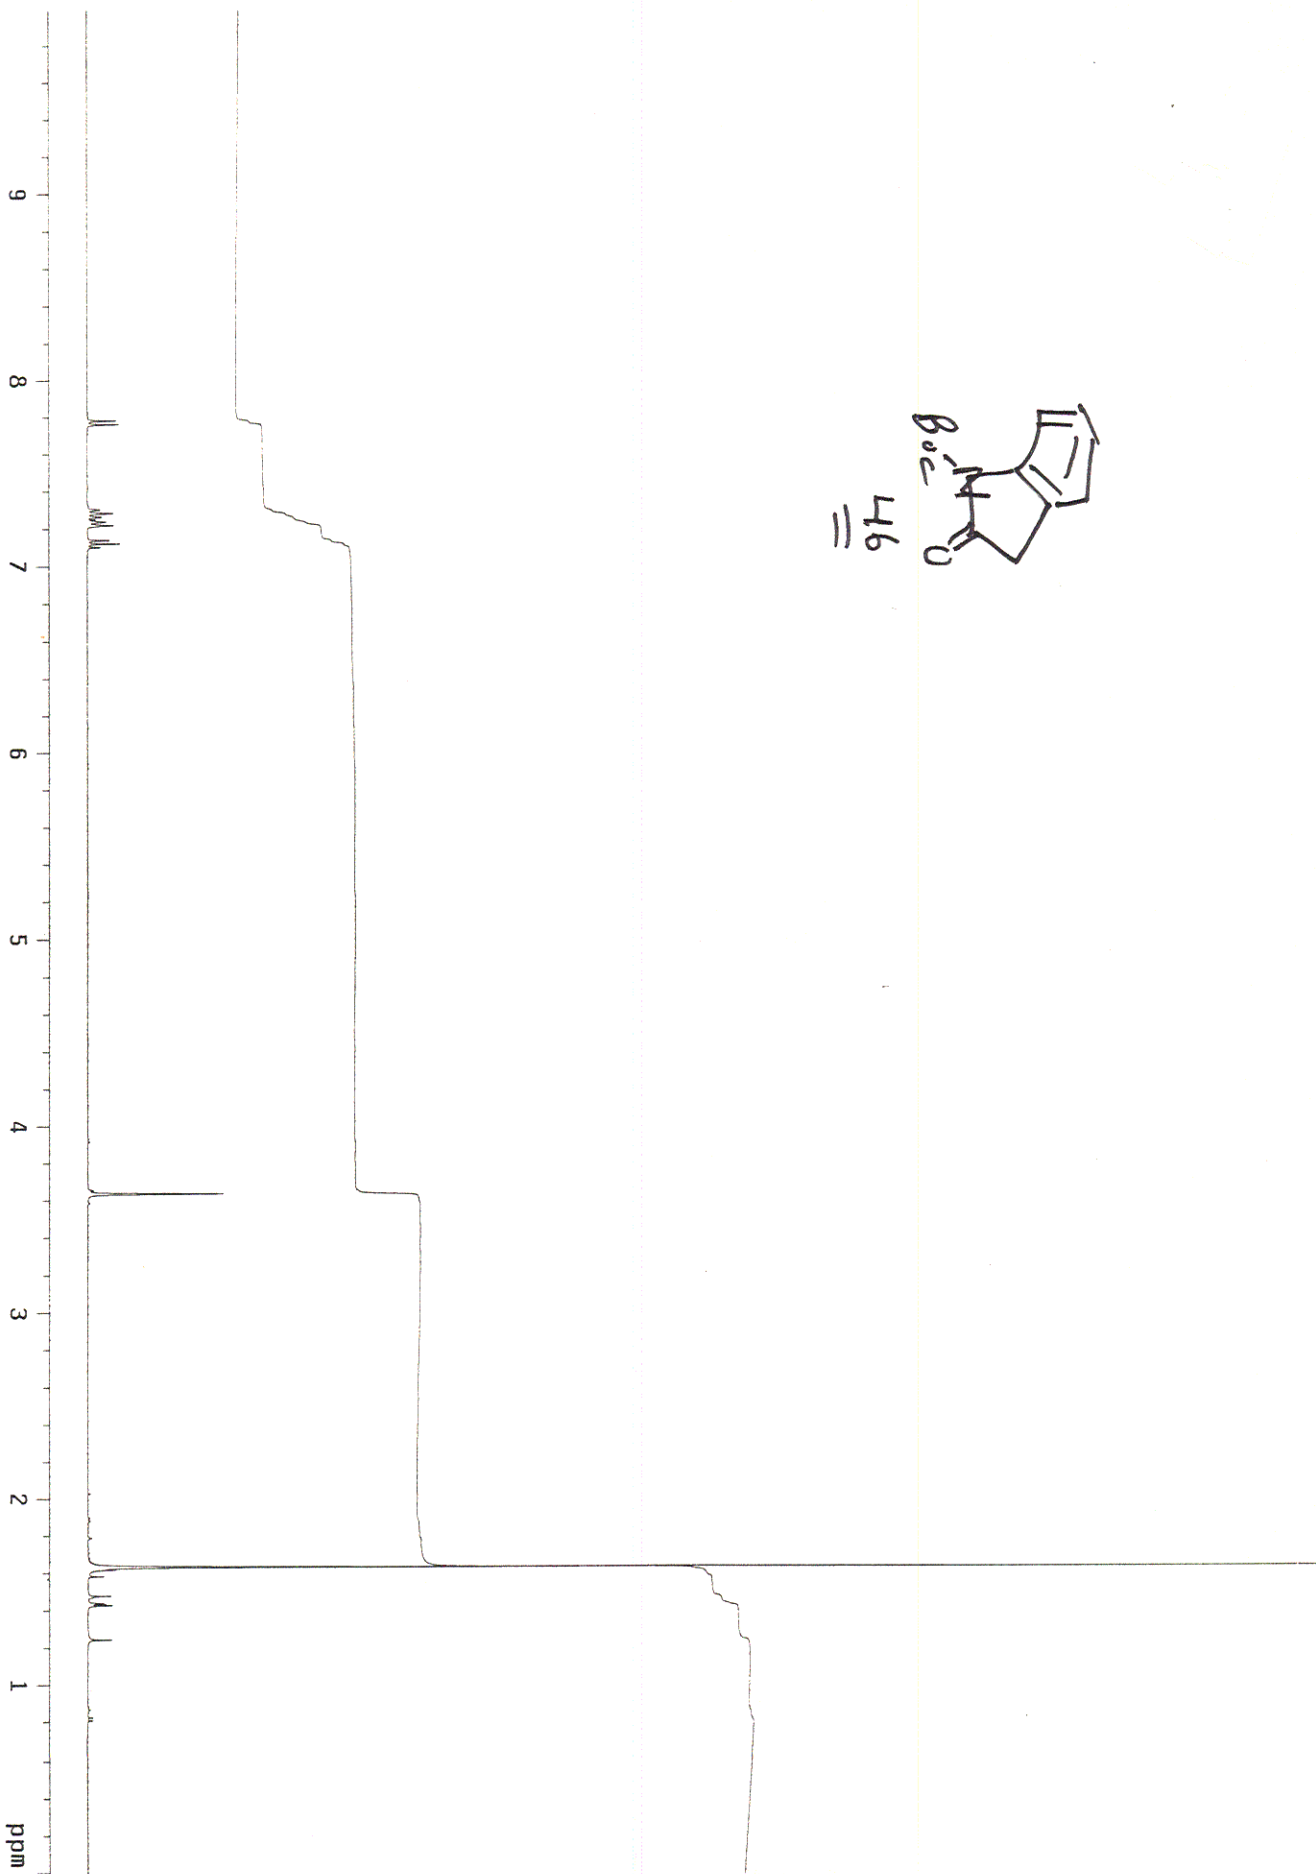

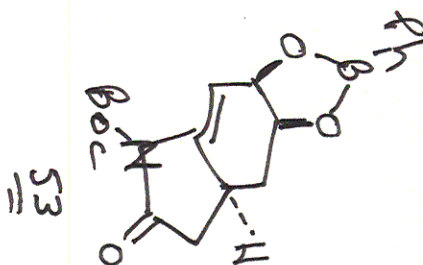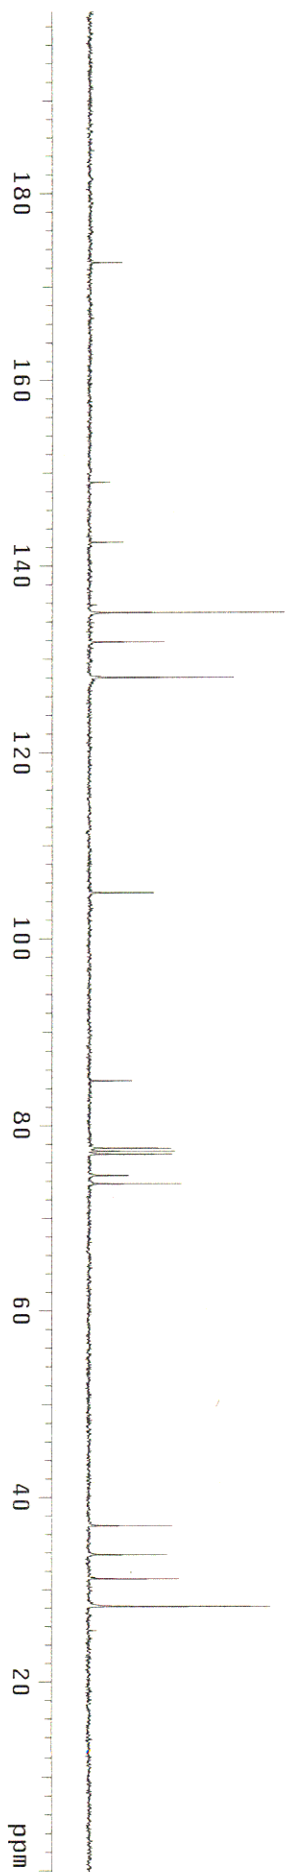

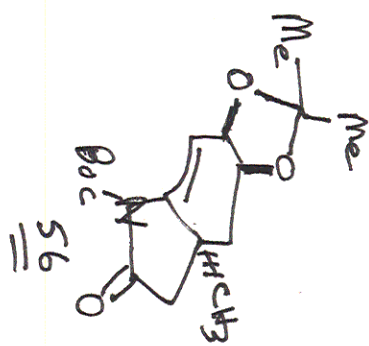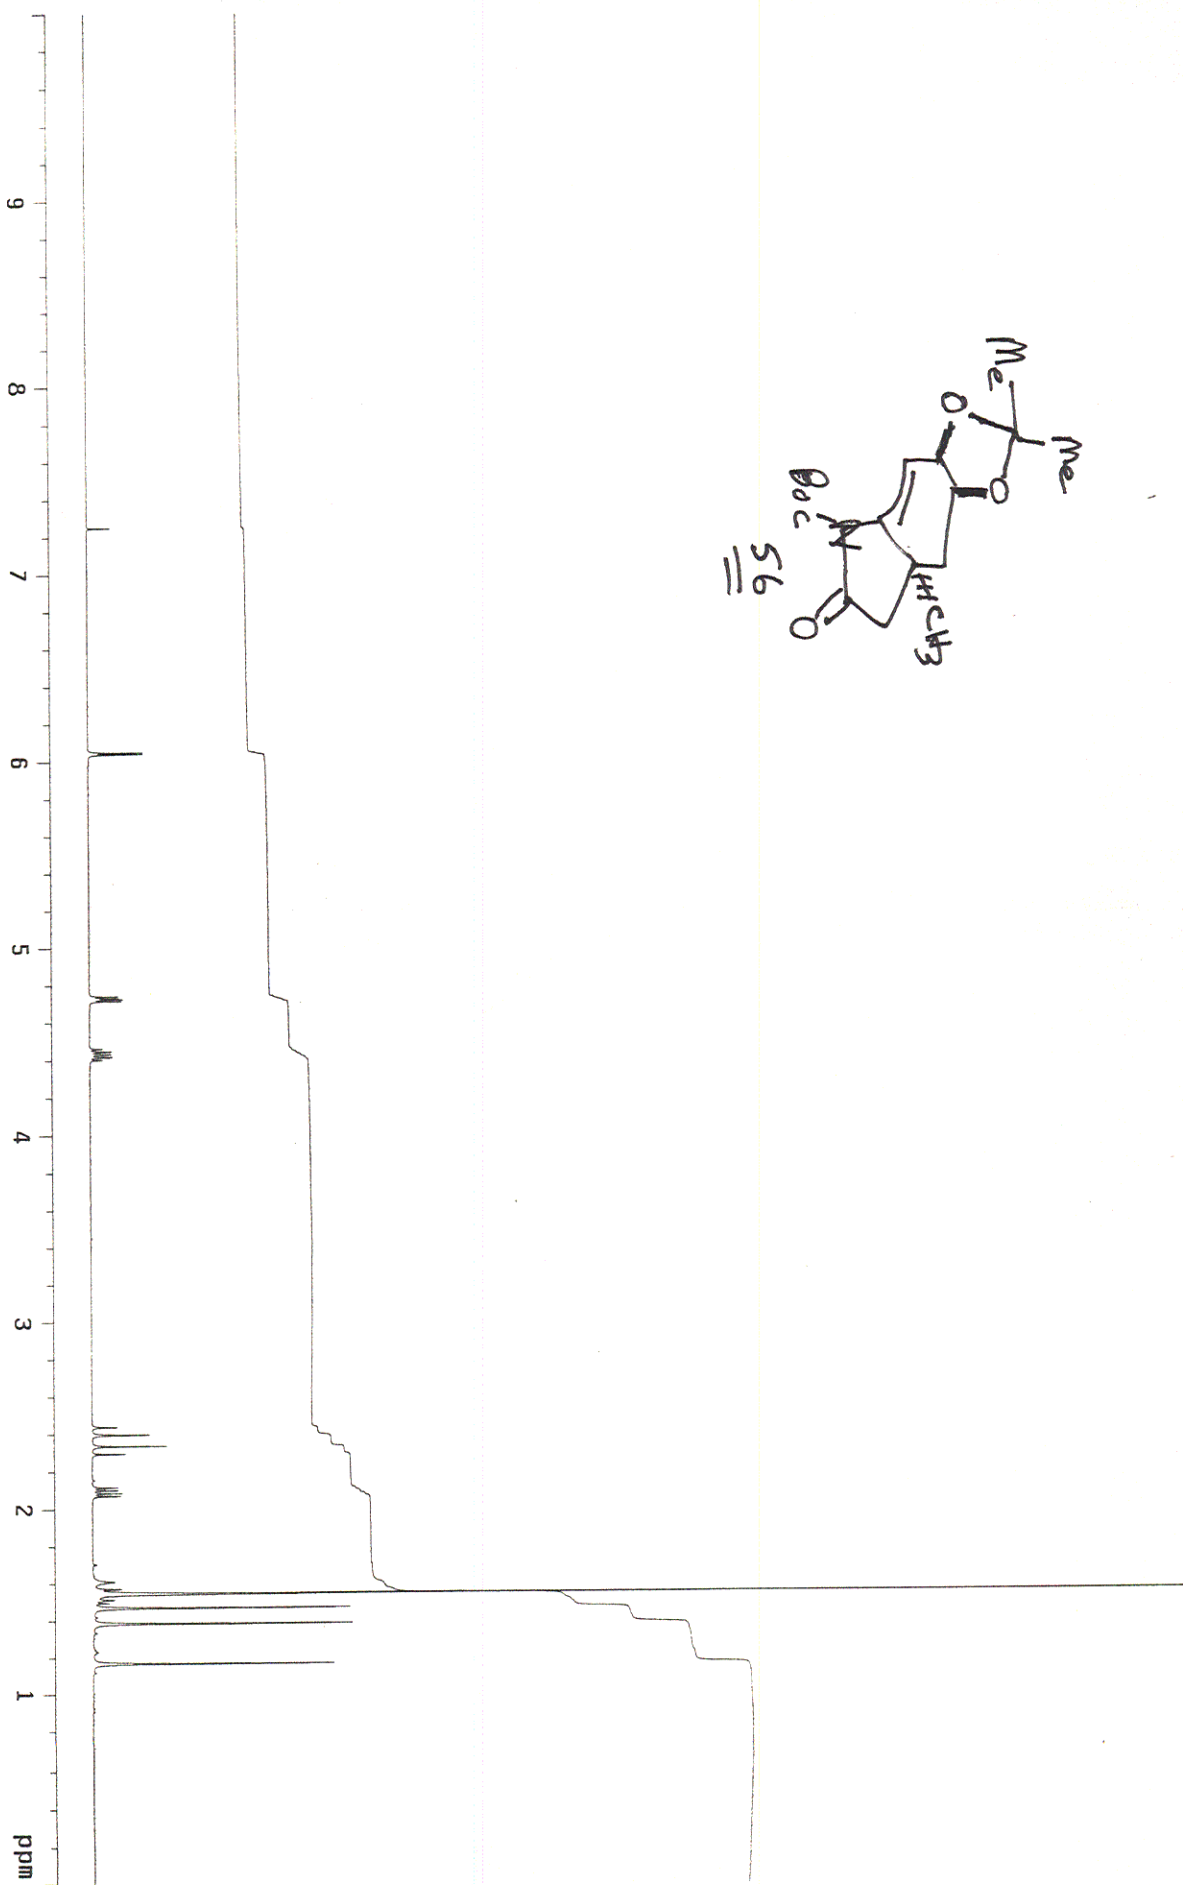



## Ortep Representation of Compound 41

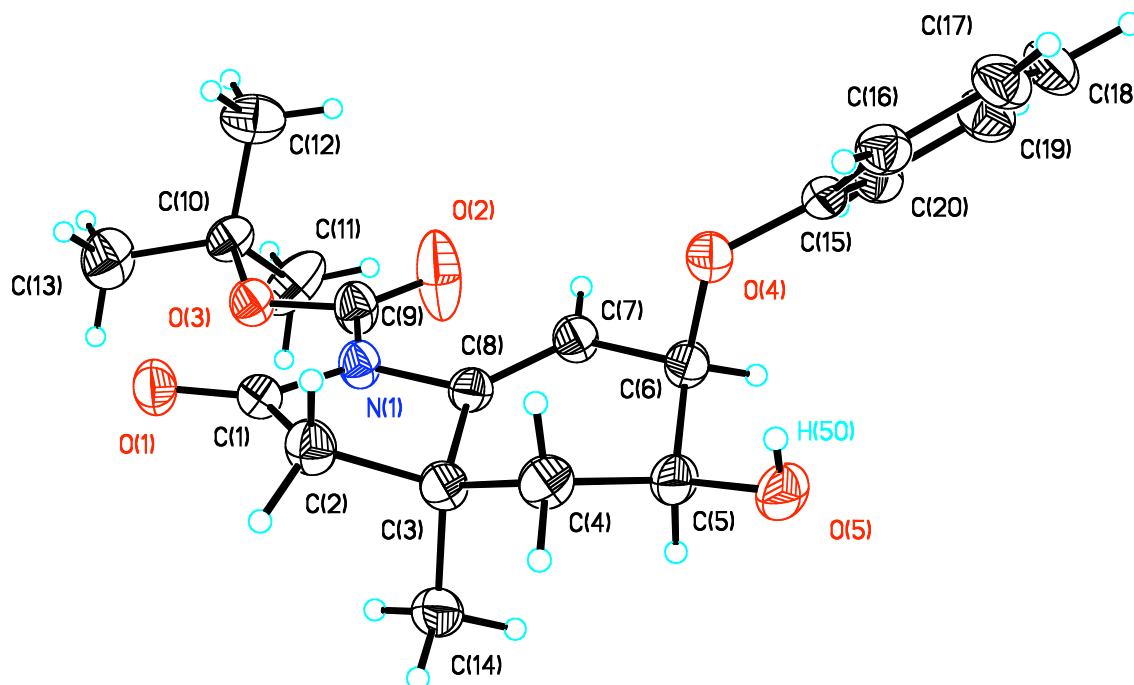

## Ortep Representation of Compound 51

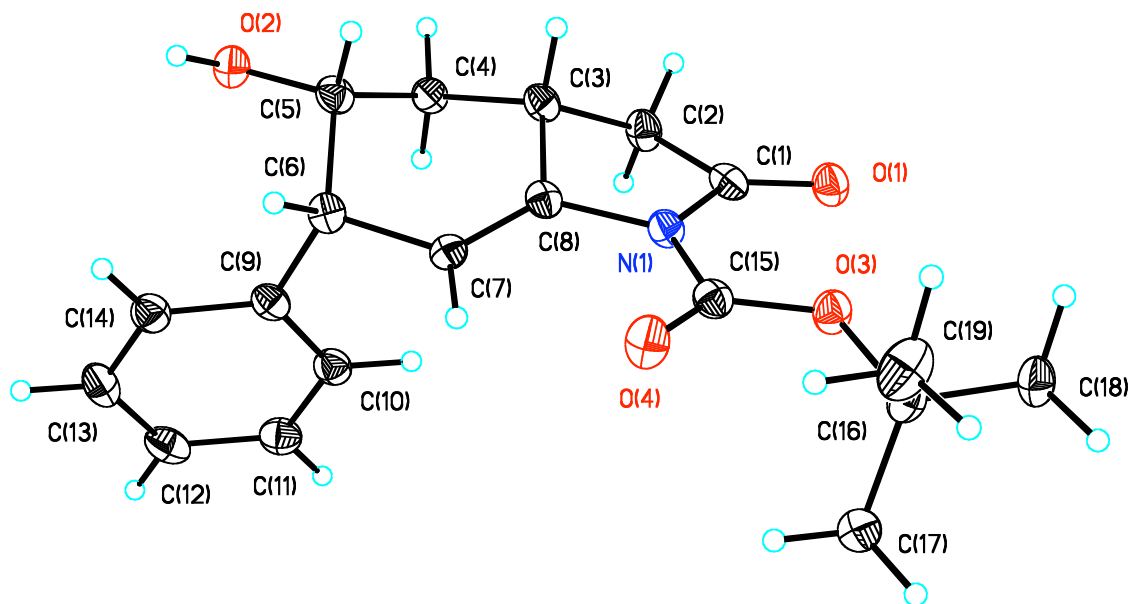

## Ortep Representation of Compound 53

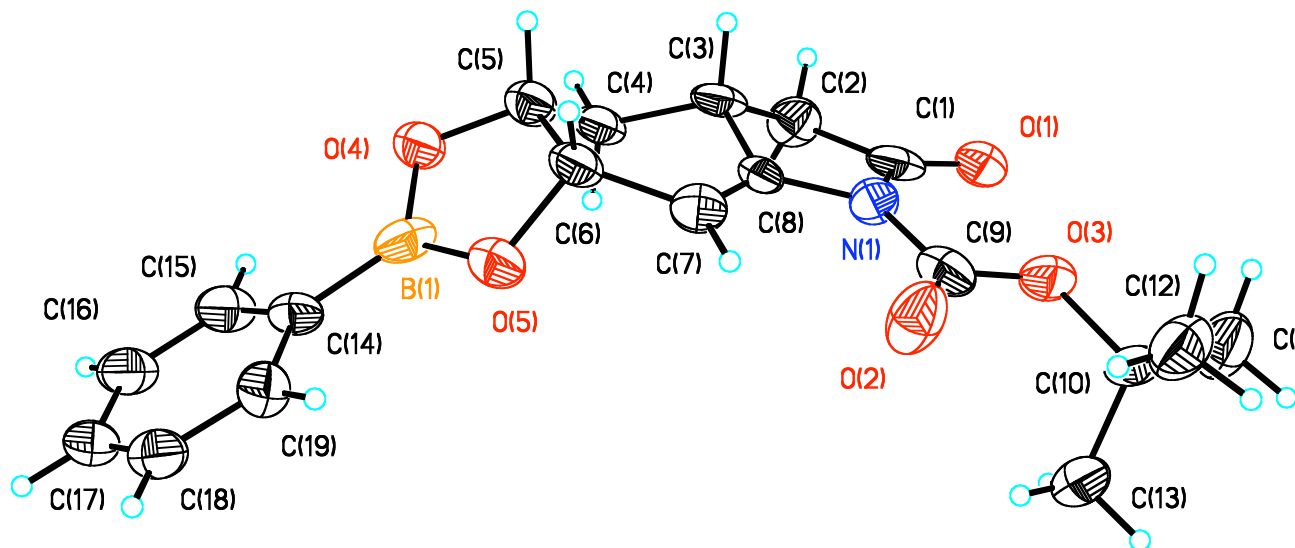

Supplement: NIHMS57531-supplement-1.pdf [file NIHMS57531-supplement-1.pdf]
